# Supplementary material for: Aptamer-Functionalized Drug Nanocarrier Improves Hepatocellular Carcinoma toward Normal by Targeting Neoplastic Hepatocytes
Source: PubMed Central journal article supplement — Mol Ther Nucleic Acids. 2020 Feb 5;20:34–49. doi: 10.1016/j.omtn.2020.01.034 (PMC7063179; doi:10.1016/j.omtn.2020.01.034), 2020-02-05
Supplement: mmc1.pdf [file mmc1.pdf]

**OMTN, Volume 20**

## **Supplemental Information**

### **Aptamer-Functionalized Drug Nanocarrier Improves Hepatocellular Carcinoma toward Normal by Targeting Neoplastic Hepatocytes**

**Samrat Chakraborty, Zewdu Yilma Dlie, Somdyuti Chakraborty, Somdatta Roy, Biswajit Mukherjee, Shila Elizabeth Besra, Saikat Dewanjee, Alankar Mukherjee, Probir Kumar Ojha, Vinay Kumar, and Ramkrishna Sen**

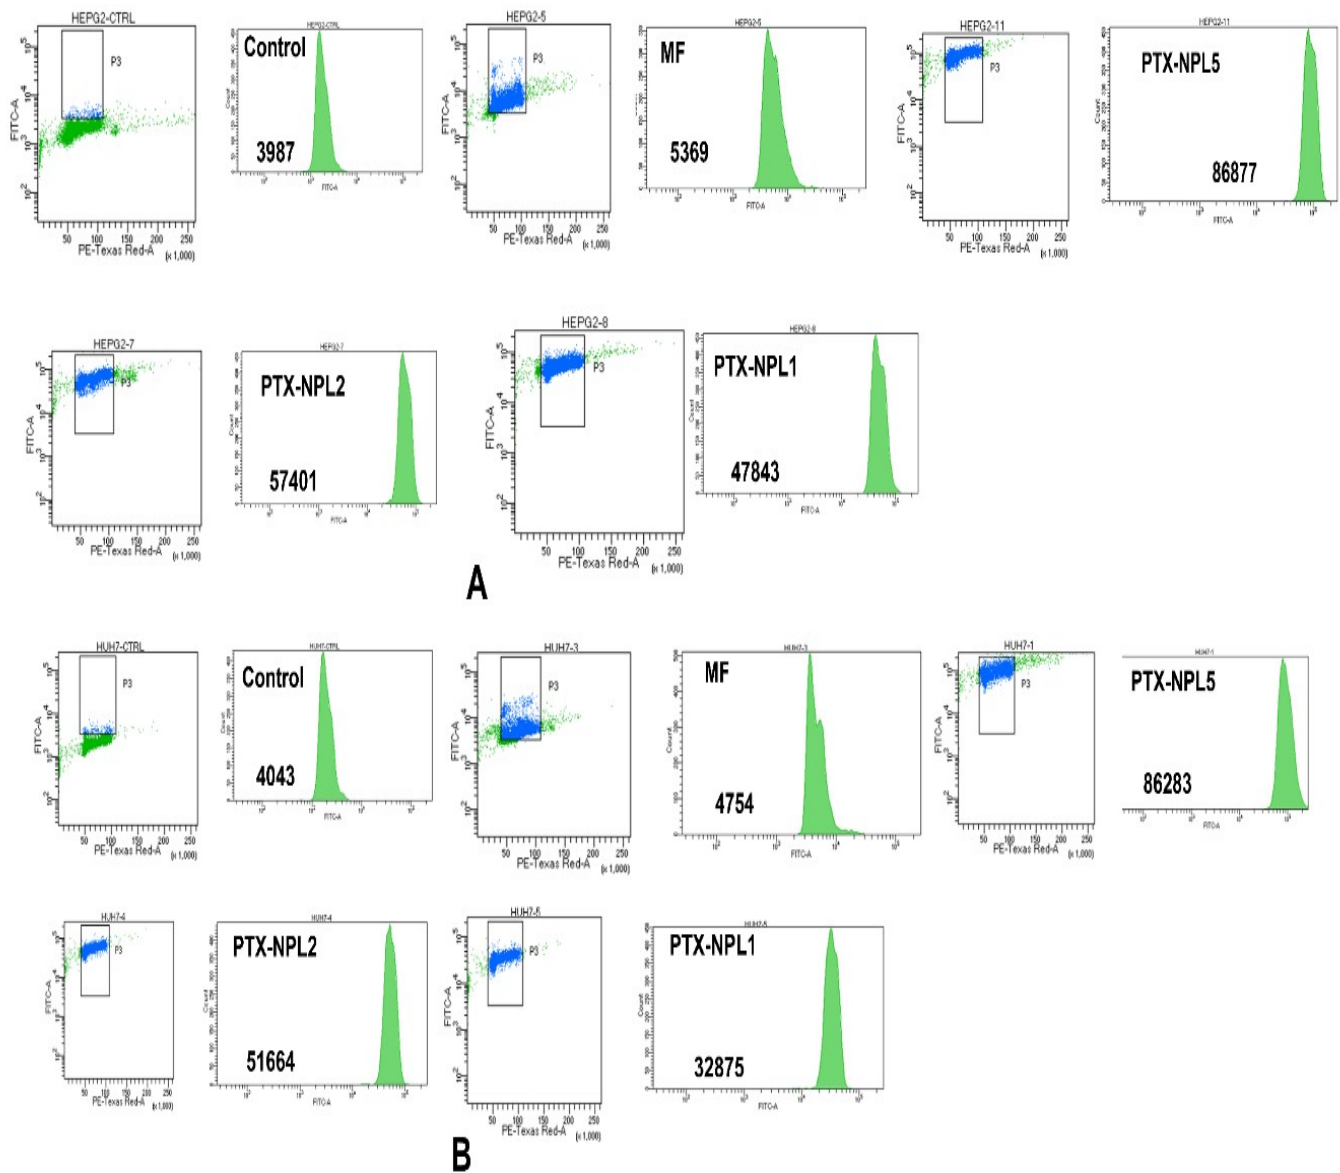

**Figure S1** Quantitative determination of extent of DNA fragmentations measured by Apo-BrdU DNA fragmentation assay kit (A) in HepG2 and (B) in Huh-7 cells respectively upon treatment with MF/PTX-NPL5/PTX-NPL2/PTX-NPL1. Numbers in each block denotes the levels of fluorescent signals. Control cells depicts cells without treatment and various treatments are shown for cells treated with various experimental formulations as mentioned in each block. Rise in fluorescent signal directly proportional to DNA strand-breaks which in turn signify DNA fragmentation.

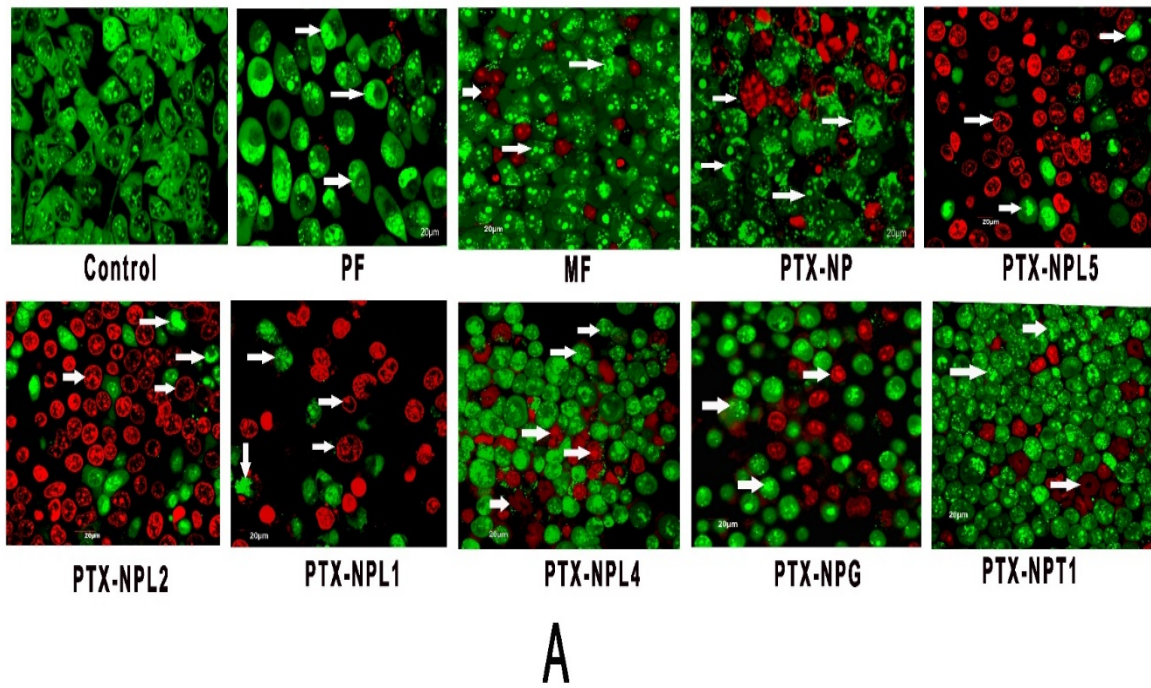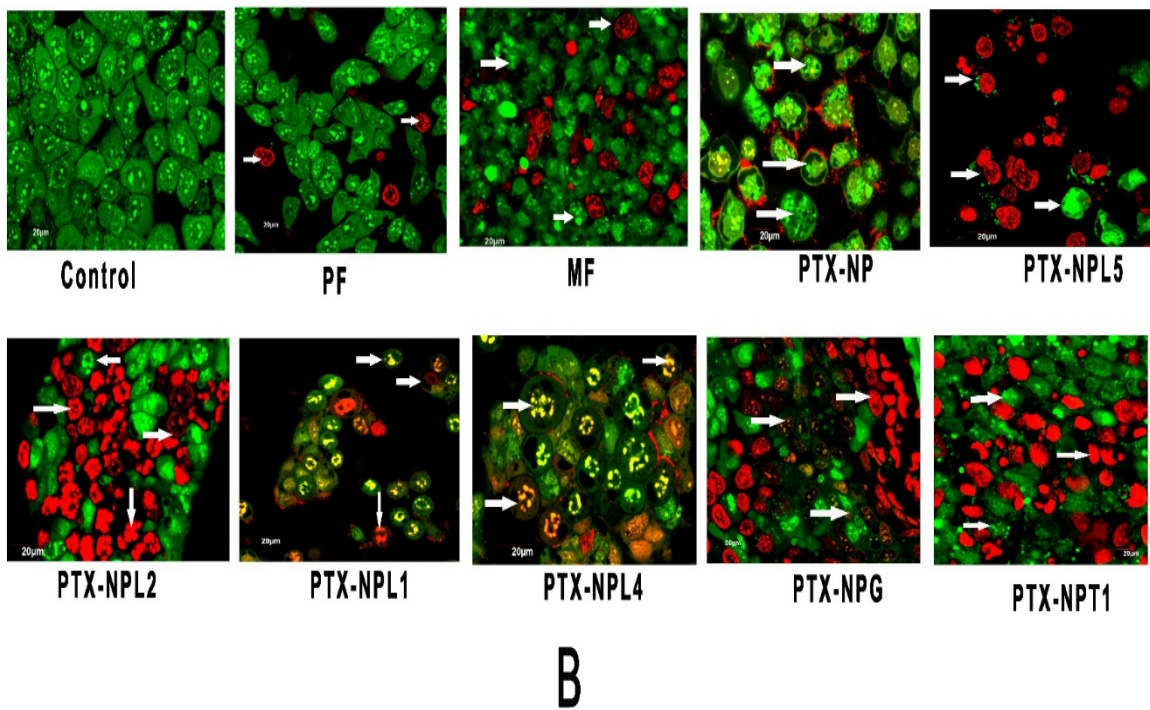

**Figure S2** Morphological changes in (A) HepG2 cells and (B) Huh-7 cells respectively, treated with different treatments as mentioned under each image. Cells without treatment considered as control. Morphological changes are indicated by arrowheads. (Scale bar - 20µm)

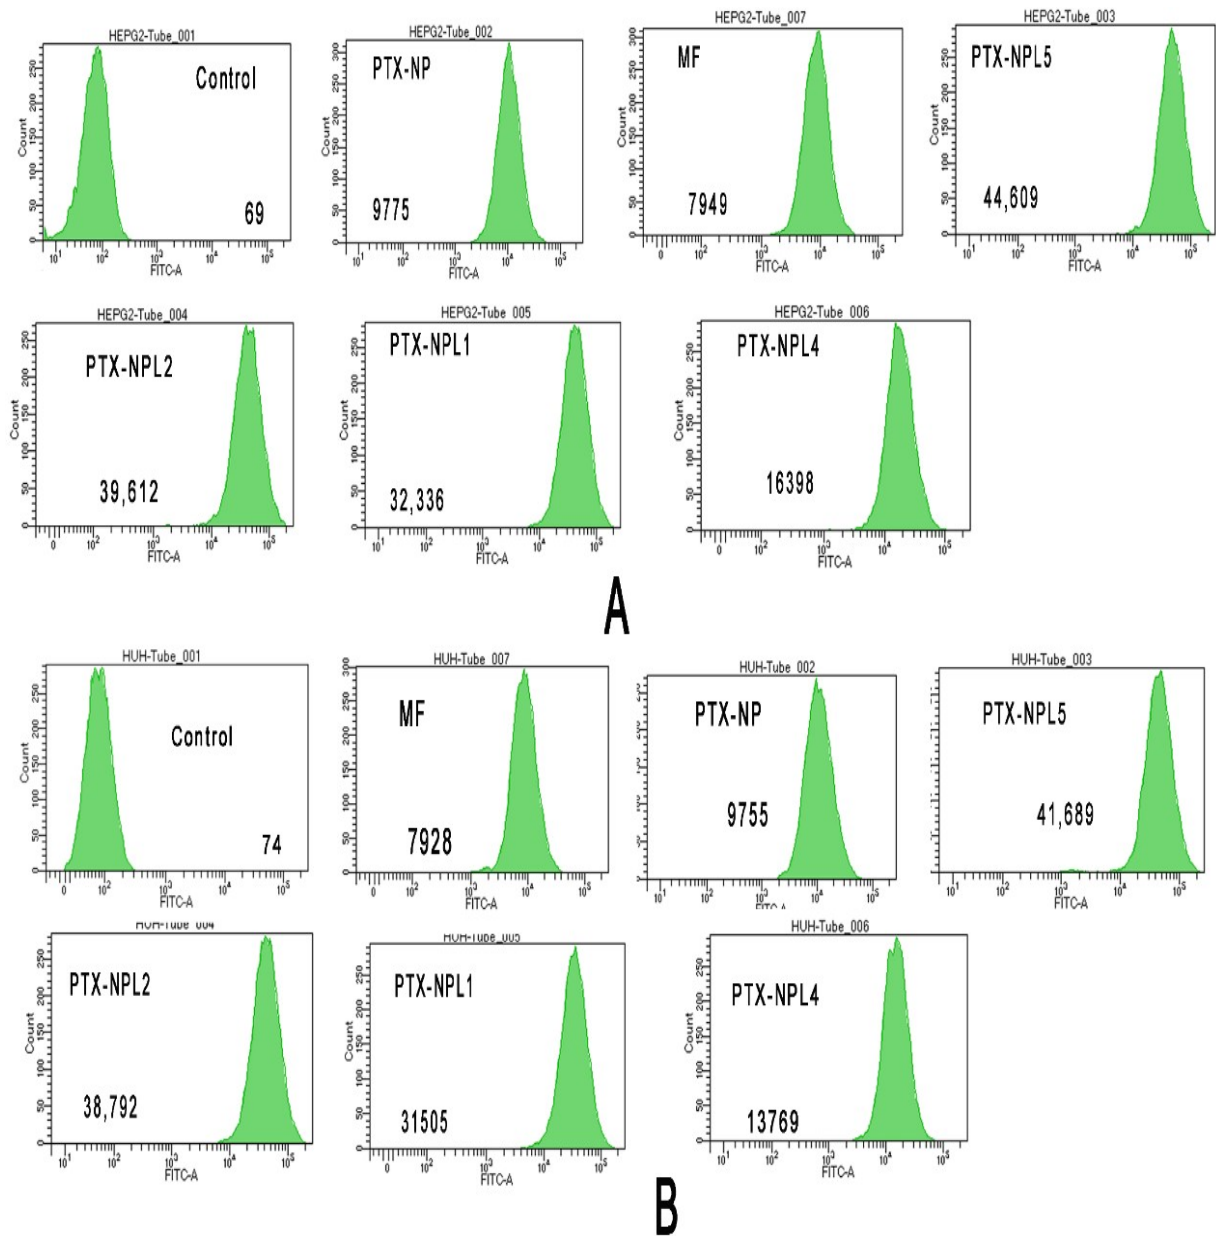

**Figure S3** Levels of reactive oxygen species (ROS) (as denoted by numbers), (A) in HepG2 and (B) in Huh7 cells upon treatment with different experimental formulations as mentioned in each block. Cells without treatment considered as control.

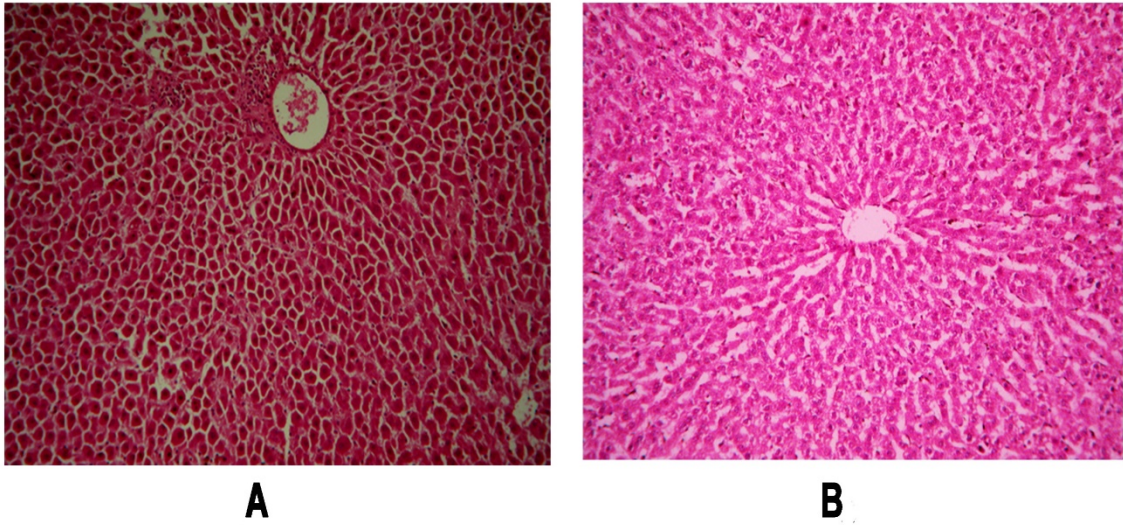

**Figure S4** Histopatological examination of liver of normal rats upon treatment with PTX-NPL5. A. Image of liver of normal (control) rats, at 100 X magnification upon H&E staining B. image of liver of normal rats at 28<sup>th</sup> day upon treatment with PTX-NPL5, at 100 X magnification upon H&E staining. No distinctive changes in liver architecture was observed, indicating its extremely low or no-toxicity against normal hepatocytes.

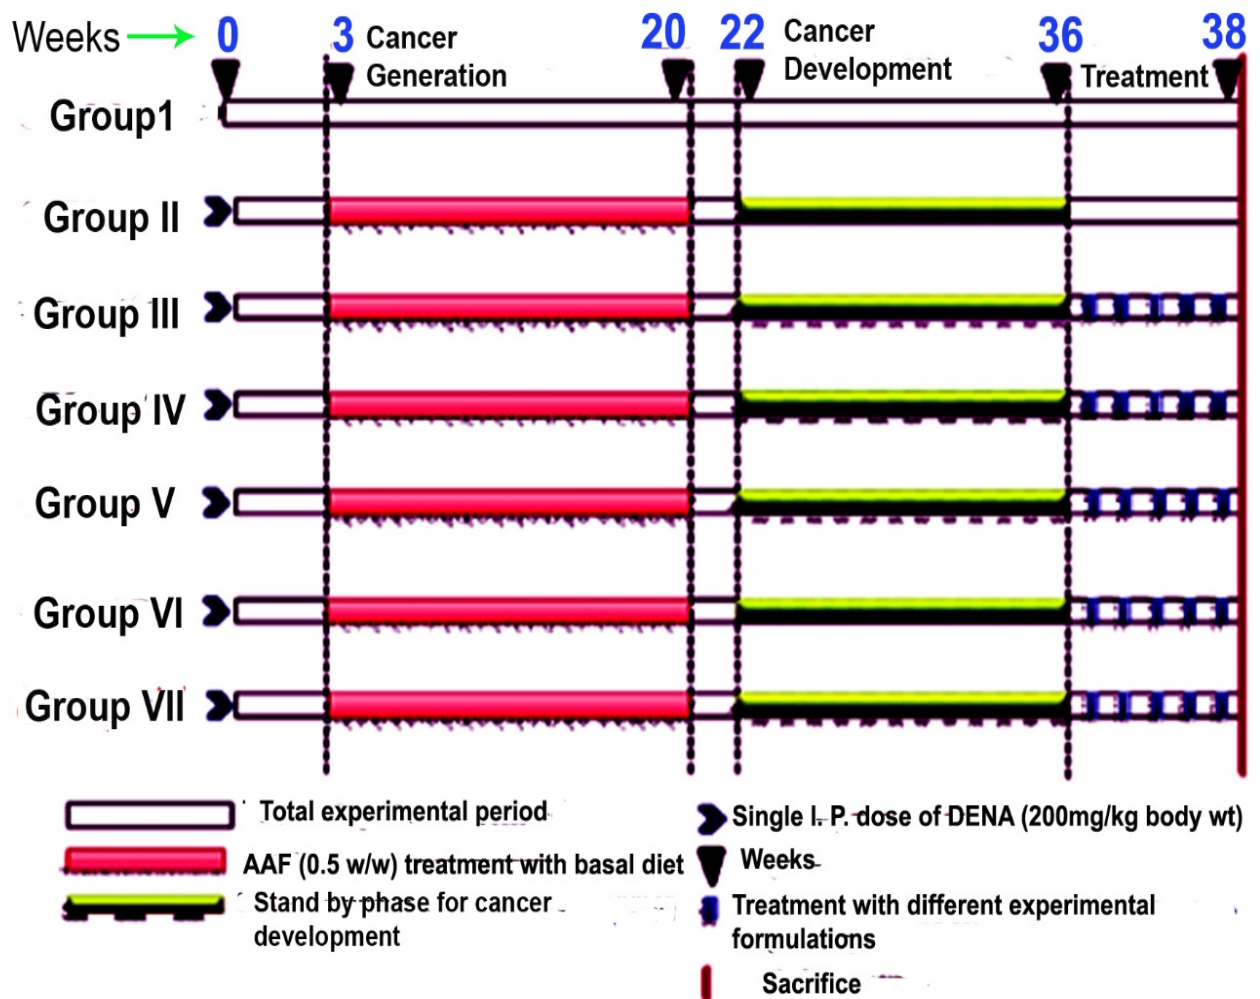

**Figure S5** Scheme for induction of chemically-induced hepatocarcinogenesis in rats. Group-I (normal control rats), Group-II (carcinogen control rats), Group-III (carcinogen treated rats received MF), Group-IV (Carcinogen treated rats received PTX-NPL5), Group – V(carcinogen treated rats received PTX-NP), Group VI (carcinogen treated rats received PTX-NPL2), Group VII(carcinogen treated rats received PF)

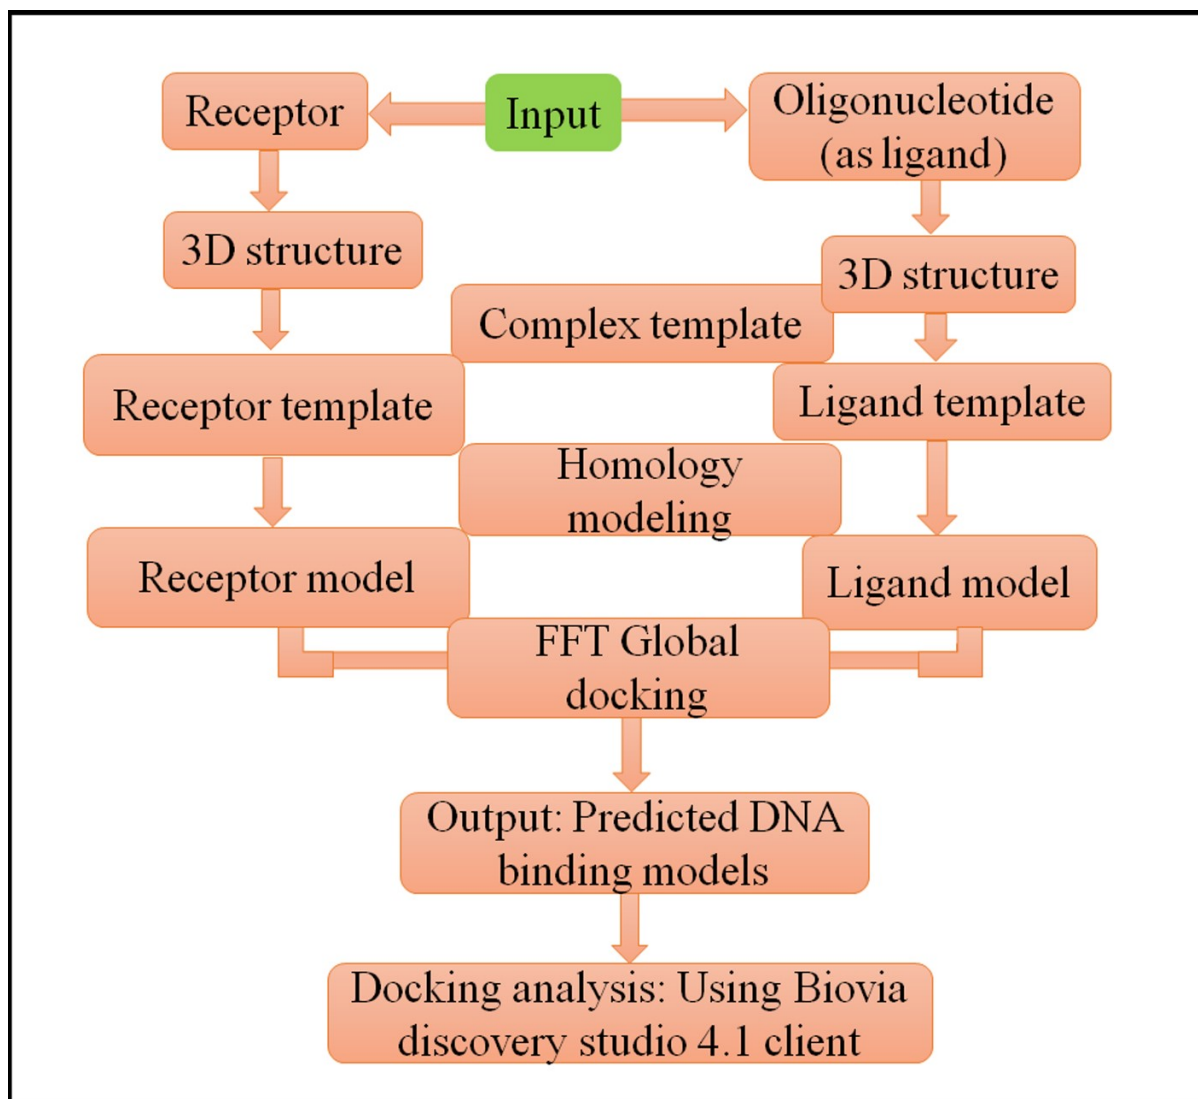

**Figure S6** Schematic representation of blind docking protocol to analyse ligand-receptor interaction of L2 and L5

**Table S1** Physical characterizations of experimental nanoparticles

| Name of the formulation | Average particle diameter (Z-average) (nm) | Polydispersity index | Zeta potential (mV) | Drug-loading (%) | Entrapment efficiency (%) |
|-------------------------|--------------------------------------------|----------------------|---------------------|------------------|---------------------------|
| PTX-NP                  | 181.5±12.25                                | 0.334                | -10.7±4.27          | 5.98±0.55        | 65.78±4.04                |
| PTX-NPL1                | 217.9±8.04                                 | 0.246                | -15.0±5.27          | 6.31±0.46        | 69.41±1.65                |
| PTX-NPL2                | 236.1±17.34                                | 0.532                | -17.7±5.19          | 6.38±0.63        | 70.18±2.14                |
| PTX-NPL3                | 229.6±15.44                                | 0.459                | -17.2±3.16          | 6.05±0.43        | 66.55±2.07                |
| PTX-NPL4                | 220.2±18.25                                | 0.323                | -16.3±3.71          | 6.14±0.37        | 67.54±4.18                |
| PTX-NPL5                | 211.9±13.43                                | 0.285                | 15.6±4.06           | 6.45±0.45        | 70.95±3.69                |
| PTX-NPG                 | 240.9±17.09                                | 0.356                | -14.6±3.71          | 6.35±0.62        | 69.85±2.76                |
| PTX-NPT1                | 242.4±19.67                                | 0.329                | -13.0±5.46          | 6.23±0.53        | 68.53±3.19                |

<sup>a</sup>Data show mean ± SD (n=3)



**Table S2** IC<sub>50</sub> doses and % inhibition in various cancerous and normal cell types, upon the treatment of experimental formulations, free-drug suspension (PF) and commercial formulation (MF)

| Treatment Groups | IC <sub>50</sub> dose in HepG2 cells (nM) | IC <sub>50</sub> dose in Huh-7 cells (nM) <sup>a</sup> | % inhibition in Chang liver cells <sup>a</sup> | % inhibition in WRL-68 cell |
|------------------|-------------------------------------------|--------------------------------------------------------|------------------------------------------------|-----------------------------|
| PF               | 995.76 ± 3.2 <sup>a</sup>                 | 989.16 ± 6.43                                          | 63.41 ± 5.88 <sup>a</sup>                      | 64.51 ± 4.08                |
| PTX-NP           | 194.71 ± 6.23                             | 198.01 ± 4.45                                          | 8.57 ± 2.50                                    | 8.89 ± 3.50                 |
| PTX-NPL1         | 73.61 ± 5.68                              | 75.48 ± 3.84                                           | 9.25 ± 2.75                                    | 9.83 ± 2.28                 |
| PTX-NPL2         | 64.54 ± 5.21                              | 67.82 ± 6.34                                           | 9.65 ± 3.68                                    | 9.7 ± 4.91                  |
| PTX-NPL3         | 192.61 ± 5.71                             | 194.28 ± 5.45                                          | 8.62 ± 3.59                                    | 8.72 ± 2.75                 |
| PTX-NPL4         | 95.06 ± 5.48                              | 98.27 ± 5.86                                           | 9.82 ± 3.94                                    | 9.58 ± 3.73                 |
| PTX-NPL5         | 42.87 ± 2.56                              | 46.64 ± 6.48                                           | 8.04 ± 2.44                                    | 8.36 ± 2.91                 |
| PTX-NPT1         | 175.56 ± 5.68                             | 178.19 ± 5.36                                          | 19.64 ± 4.61                                   | 19.2 ± 2.4                  |
| PTX-NPG          | 147.23 ± 6.45                             | 152.99 ± 6.43                                          | 18.21 ± 3.1                                    | 19.81 ± 2.33                |
| MF               | 380.06 ± 5.83                             | 363.51 ± 4.51                                          | 71.85 ± 6.56                                   | 74.45 ± 3.98                |

<sup>a</sup>Data show mean ± standard deviation (n=3)

**Table S3** Tumor incidences, numbers and size distribution of hepatic altered foci (HAF) and area of neoplastic lesions on rats-treated with hepatocarcinogen (carcinogen control rats) and carcinogen-treated rats treated with different experimental formulations

| Groups                                               | Numbers of tumor bearing rats/ total no. of rats | Size distribution of HAF (% of total no.) |              |             | Area of lesion (% of total hepatic area observed) |
|------------------------------------------------------|--------------------------------------------------|-------------------------------------------|--------------|-------------|---------------------------------------------------|
|                                                      |                                                  | <1mm                                      | >1mm to <3mm | > 3mm       |                                                   |
| Normal control rats                                  | 0/6                                              | 00                                        | 00           | 00          | 00                                                |
| Carcinogen-control rats                              | 6/6                                              | 16.07±1.16                                | 40.65±.098   | 43.51±3.12  | HAF = 83.23±3.02 <sup>a</sup>                     |
| Carcinogen-treated rats treated with free-drug (PF)  | 6/6                                              | 16.38±1.32                                | 41.01±1.15   | 42.61±2.67  | HAF= 82.04±3.21                                   |
| Carcinogen-treated rats treated with commercial (MF) | 5/6                                              | 13.19±1.06*                               | 48.53±2.27   | 38.28±2.19  | HAF = 71.62±4.18                                  |
| Carcinogen-treated rats treated with PTX-NP          | 4/6                                              | 32.45±3.62*                               | 42.39±4.21*  | 25.14±4.01* | HAF= 52.43±2.33                                   |
| Carcinogen-treated rats treated with PTX-NPL2        | 2/6                                              | 58.45±4.21*                               | 26.87±3.86*  | 14.68±3.06* | HAF = 31.45±2.85                                  |
| Carcinogen-control rats – treated with PTX-NPL5      | 0/6                                              | 82.47±3.48*                               | 14.56±4.5*   | 3.08±0.056* | HAF = 19.23±3.53                                  |

Data show mean ± SD (n=6). “\*” indicates p<0.05 when compared with data of carcinogen-control rats.

**Table S4** Determination of body weight of rats belong to different to different groups used for in vivo study during the course of the experiment

| Days/weeks                                   | Normal-control Rats        | Carcinogen-control rats | Carcinogen -treated rats treated with free-drug suspension (PF) | Carcinogen -treated rats treated with commercial formulation (MF) | Carcinogen-treated rats treated with PTX-NP | Carcinogen -treated rats treated with PTX-NPL2 | Carcinogen -treated rats treated with PTX-NPL5 |
|----------------------------------------------|----------------------------|-------------------------|-----------------------------------------------------------------|-------------------------------------------------------------------|---------------------------------------------|------------------------------------------------|------------------------------------------------|
| 1 <sup>st</sup> Day                          | 141.2± 5.2 <sup>a, b</sup> | 144.4 ± 7.5             | 143.4 ± 6.8 <sup>a, b</sup>                                     | 148.7 ± 5.4                                                       | 147.5 ± 4.6                                 | 146.6 ± 4.3                                    | 140.4 ± 5.8                                    |
| 7 <sup>th</sup> day (1 <sup>st</sup> week)   | 145.8 ± 6.3                | 143.7 ± 6.3             | 141.8 ± 9.2                                                     | 146.5 ± 4.9                                                       | 144.4 ± 6.6                                 | 144.4 ± 5.2                                    | 141.01 ± 4.7                                   |
| 2 <sup>nd</sup> week                         | 148.5 ± 6.5                | 142.4± 6.3              | 141.9 ± 3.9                                                     | 145.2 ± 5.6                                                       | 140.6 ± 3.7                                 | 142.2 ± 6.3                                    | 139.6 ± 5.2                                    |
| 3 <sup>rd</sup> week                         | 152.3 ± 4.6                | 140.8 ± 7.5*            | 139.7 ± 5.3*                                                    | 144.4 ± 3.8*                                                      | 139.1 ± 5.2*                                | 140.7 ± 8.3*                                   | 140.2 ± 7.5*                                   |
| 4 <sup>th</sup> week (First month)           | 156.4 ± 5.5                | 139.8 ± 4.8*            | 138.6 ± 6.4*                                                    | 145.8 ± 5.3*                                                      | 138.4 ± 3.5*                                | 138.9 ± 6.2*                                   | 138.7 ± 8.1*                                   |
| 5 <sup>th</sup> week                         | 162.8 ± 6.3                | 138.5 ± 5.8*            | 138.1± 4.6*                                                     | 143.9 ± 5.8*                                                      | 137.6 ± 4.4*                                | 136.6 ± 5.3*                                   | 137.2 ± 4.1*                                   |
| 6 <sup>th</sup> week                         | 170.4 ± 6.2                | 136.6 ± 5.9*            | 137.8 ± 3.6 *                                                   | 142.3 ± 6.4*                                                      | 136.8 ± 5.3*                                | 136.5 ± 4.5*                                   | 136.8 ± 7.1*                                   |
| 7 <sup>th</sup> week                         | 178.6 ± 8.2                | 134.4 ± 10.2*           | 136.2 ± 5.8*                                                    | 139.8 ± 4.4*                                                      | 134.4 ± 5.2*                                | 135.3 ± 7.8*                                   | 134.8 ± 3.4*                                   |
| 8 <sup>th</sup> week (2 <sup>nd</sup> Month) | 186.4 ± 9.2                | 130.5 ± 5.5*            | 132.7 ± 8.6*                                                    | 135.8 ± 6.8*                                                      | 129.8 ± 4.8*                                | 130.5 ± 5.6*                                   | 131.8 ± 6.5*                                   |
| Third month                                  | 196 ± 5.8                  | 127.3 ± 5.8*            | 129.8 ± 6.4*                                                    | 128.8 ± 3.6*                                                      | 126.6 ± 5.5*                                | 127.8 ± 6.2*                                   | 128.6 ± *4.6                                   |
| Fourth month                                 | 204.6 ± 5.7                | 125.8 ± 4.3*            | 126.4 ± 4.6                                                     | 125.6 ± 4.8*                                                      | 124.6 ± 6.4*                                | 124.4 ± 5.1*                                   | 125.1 ± 3.7*                                   |
| Fifth Month                                  | 212.3 ± 6.9                | 123.4 ± 5.8*            | 123.6 ± 5.8*                                                    | 122.2 ± 5.8*                                                      | 122.6 ± 7.4*                                | 121.8 ± 4.8*                                   | 122.4 ± 6.5*                                   |
| Sixth Month                                  | 220 ± 9.8                  | 120.6 ± 5.8*            | 121.8 ± 5.8*                                                    | 120.4 ± 8.2*                                                      | 119.7 ± 5.1*                                | 119.6 ± 7.4*                                   | 118.4 ± 4.8*                                   |
| Seventh Month                                | 225.7 ± 9.5                | 117.6± 5.8*             | 118.8 ± 4.7*                                                    | 116.8 ± 7.6*                                                      | 116.7 ± 5.8*                                | 115.4 ± 5.2*                                   | 114.8 ± 3.6*                                   |
| Eight month                                  | 229.6 ± 8.8                | 114.7 ± 4.5*            | 112.7± 4.7*                                                     | 113.4 ± 5.5*                                                      | 113.8 ± 4.8*                                | 111.6 ± 5.6*                                   | 110.7 ± 4.4*                                   |
| Nine month                                   | 235.6 ± 10.52              | 109.6 ± 3.5*            | 108.8 ± 5.3*                                                    | 108.9 ± 6.2*                                                      | 107.5 ± 4.2*                                | 107.8 ± 3.3*                                   | 105.4 ± 5.1*                                   |
| After treatment                              |                            |                         |                                                                 |                                                                   |                                             |                                                |                                                |
| One day                                      |                            |                         | 110.4 ± 5.4                                                     | 110.7 ± 5.8                                                       | 112.3 ± 4.8                                 | 113.4 ± 3.7                                    | 111.3 ± 4.8                                    |
| 3 <sup>rd</sup> day                          |                            |                         | 111.4 ± 4.1                                                     | 116.9 ± 4.7                                                       | 117.1 ± 7.5                                 | 119.6 ± 8.4                                    | 120.8 ± 5.8                                    |
| 7 <sup>th</sup> day                          |                            |                         | 113.8 ± 3.2                                                     | 118.6 ± 3.9#                                                      | 122.4 ± 4.3#                                | 125.6 ± 5.1#                                   | 126.8 ± 2.6#                                   |

|                      |                |                 |                 |                 |                 |
|----------------------|----------------|-----------------|-----------------|-----------------|-----------------|
| 10 <sup>th</sup> Day | 113.6 ±<br>6.8 | 119.8 ±<br>5.8# | 130.6 ±<br>4.5# | 133.6 ±<br>4.8# | 134.8 ±<br>5.4# |
| 14 <sup>th</sup> Day | 112.4 ±<br>7.2 | 118.8 ±<br>4.6# | 132.8 ±<br>8.6# | 136.6 ±<br>6.4# | 139.8 ±<br>3.7# |

<sup>a</sup>weight of the rats were expressed in gram, <sup>b</sup>data are expressed as mean ±SD (n=6). “\*” indicates p <0.05 when the weights of rats belong to carcinogen-control group and different treatments groups were compared with the rats of normal control group before the treatment. “#” indicates p <0.05 when the weights of rats of different treatments groups were compared with those of the rats carcinogen-control group.

**Table S5** Levels of different biochemical parameters in liver of normal rats treated with different treatments

| Group     | SGPT (IU/l)<br>±SD(n=3)     |                             | SGOT (IU/l)<br>±SD(n=3)     |                              | ALK (IU/l)<br>±SD(n=3)       |                              |
|-----------|-----------------------------|-----------------------------|-----------------------------|------------------------------|------------------------------|------------------------------|
|           | 0 days                      | 28 days                     | 0 days                      | 28 days                      | 0 days                       | 28 days                      |
| Control   | 43.73<br>±1.51 <sup>a</sup> | 46.85<br>±1.45              | 58.77±2.81                  | 60.61±<br>2.09               | 191.32±<br>2.70              | 213.58±<br>1.57              |
| PF        | 47.37±1.64 <sup>*</sup>     | 64.03<br>±1.59 <sup>*</sup> | 61.16±2.42                  | 96.50±<br>1.15 <sup>*</sup>  | 196.62±<br>3.90 <sup>*</sup> | 252.29±<br>3.70 <sup>*</sup> |
| MF        | 49.22<br>±1.00 <sup>*</sup> | 95.68<br>±3.94 <sup>*</sup> | 62.31±<br>1.08 <sup>*</sup> | 122.71±<br>2.71 <sup>*</sup> | 195.56±<br>4.15 <sup>*</sup> | 294.03±<br>3.55 <sup>*</sup> |
| PTX-NP    | 41.27<br>±1.01              | 57.43<br>±1.02 <sup>*</sup> | 54.96±<br>3.88              | 75.30±<br>3.09 <sup>*</sup>  | 194.89±<br>2.17 <sup>*</sup> | 225.99±<br>2.13 <sup>*</sup> |
| PTX-NP L2 | 41.57<br>±1.53              | 51.91±<br>1.16              | 56.66±<br>3.08              | 72.69±<br>3.71 <sup>*</sup>  | 196.01±<br>2.93              | 227.11±<br>4.05 <sup>*</sup> |
| PTX-NP L5 | 40.28<br>±1.07              | 49.62±<br>1.46              | 55.24±<br>1.18              | 70.57±<br>1.70               | 192.10±<br>1.15              | 222.43±<br>3.92              |

<sup>a</sup> Data mean ± SD (n=6) ; “\*” indicates  $p < 0.05$  with respect to the value of control group of rats

**Table S6** Changes in bodyweight of normal rats–treated with different treatments

| Days                 | Normal control rats         | Normal control rats-treated with free-drug suspension (PF) | Normal control rats-treated with commercial formulation (MF) | Normal control rats-treated with PTX-NP | Normal control rats-treated with PTX-NPL2 | Normal control rats-treated with PTX-NPL5 |
|----------------------|-----------------------------|------------------------------------------------------------|--------------------------------------------------------------|-----------------------------------------|-------------------------------------------|-------------------------------------------|
| 1 <sup>st</sup> Day  | 140.5 ± 5.4 <sup>a, b</sup> | 139.8 ± 4.5 <sup>a, b</sup>                                | 141.4 ± 3.6                                                  | 142.3 ± 6.2                             | 145 ± 6.5                                 | 143 ± 5.8                                 |
| 2 <sup>nd</sup> Day  | 140.8 ± 4.8                 | 135.2 ± 5.2*                                               | 129.8 ± 4.4*                                                 | 140 ± 5.6                               | 143 ± 4.8                                 | 142 ± 3.5                                 |
| 3 <sup>rd</sup> Day  | 141.4 ± 4.4                 | 126.5 ± 3.4*                                               | 117.6 ± 5.9*                                                 | 138.6 ± 4.8                             | 142 ± 5.1                                 | 140 ± 3.8                                 |
| 4 <sup>TH</sup> day  | 143.6 ± 6.4                 | 115 ± 7.6*                                                 | 102.6 ± 4.8*                                                 | 137.4 ± 5.5                             | 140 ± 2.8                                 | 139.4 ± 4.4                               |
| 7th day              | 144.8 ± 4.5                 | 108 ± 5.6*                                                 | 90.5 ± 5.4*                                                  | 138.5 ± 3.2                             | 141 ± 4.8                                 | 140.4 ± 6.6                               |
| 14th day             | 146.2 ± 6.5                 | 98.9 ± 4.4*                                                | 75.3 ± 3.8*                                                  | 137.4 ± 5.8                             | 140 ± 6.4                                 | 140.8 ± 3.6                               |
| 21 <sup>st</sup> day | 147.8 ± 5.8                 | 90.5 ± 6.3*                                                | 62.5 ± 4.5*                                                  | 138.7 ± 2.8                             | 141 ± 5.7                                 | 141.4 ± 5.4                               |
| 28 <sup>th</sup> day | 149.2 ± 4.3                 | 79.7 ± 2.6*                                                | 48.7 ± 6.4*                                                  | 137.3 ± 5.5                             | 139 ± 4.2                                 | 140.6 ± 4.3                               |

<sup>a</sup> weight of rats were expressed in gram, <sup>b</sup> data were expressed as mean ± SD (n=6). Statistical level of significance is indicated as “\*” (p<0.05), when the data of the treatment groups were compared with those of the normal (control) rats.

**Table S7:** Concentration of PTX (ng/g liver) in normal SD rats upon i.v. administration of experimental formulations

| Time (h) | Upon administration of free-drug (PF) | Upon administration of commercial formulation (MF) | Upon administration of PTX-NP | Upon administration of PTX-NPL2 | Upon administration of PTX-NPL5 |
|----------|---------------------------------------|----------------------------------------------------|-------------------------------|---------------------------------|---------------------------------|
| 1        | 97.17 ± 2.34 <sup>*</sup>             | 230.16 ± 8.21 <sup>c</sup>                         | 116.12 ± 2.56 <sup>b,e</sup>  | 120.45 ± 3.28 <sup>c,e</sup>    | 118.24 ± 4.45 <sup>b,e</sup>    |
| 2        | 219.45 ± 4.13                         | 328.12 ± 2.19 <sup>c</sup>                         | 198.12 ± 6.28 <sup>b,e</sup>  | 203.34 ± 3.48 <sup>a,e</sup>    | 201.24 ± 6.67 <sup>b,e</sup>    |
| 4        | 267.71 ± 9.82                         | 431.25 ± 7.73 <sup>c</sup>                         | 231.19 ± 4.21 <sup>c,e</sup>  | 235.72 ± 2.17 <sup>c,e</sup>    | 233.57 ± 5.13 <sup>c,e</sup>    |
| 6        | 92.74 ± 7.48                          | 418.25 ± 5.45 <sup>c</sup>                         | 320.16 ± 4.13 <sup>c,e</sup>  | 322.68 ± 5.32 <sup>c,e</sup>    | 325.48 ± 2.26 <sup>c,e</sup>    |
| 8        | 18.83 ± 3.86                          | 226.27 ± 4.32 <sup>c</sup>                         | 202.37 ± 2.62 <sup>c,e</sup>  | 205.81 ± 4.18 <sup>c,e</sup>    | 208.41 ± 3.19 <sup>c,d</sup>    |
| 10       | BLQ                                   | 130.48 ± 6.18                                      | 104.16 ± 5.13                 | 106.38 ± 3.18                   | 108.51 ± 4.82                   |
| 24       | BLQ                                   | 56.57 ± 3.28                                       | 44.82 ± 7.32                  | 46.58 ± 8.23                    | 42.34 ± 5.21                    |
| 48       | BLQ                                   | 26.12 ± 4.38                                       | 14.47 ± 5.29 <sup>d</sup>     | 15.65 ± 4.15 <sup>d</sup>       | 13.46 ± 7.14 <sup>d</sup>       |

\*Data show mean ± SD (n=3). <sup>(a,b,c,d,e)</sup>Significant difference when compared to the data obtained upon free-drug treatment (<sup>a</sup>p<0.05, <sup>b</sup>p<0.01, <sup>c</sup>p<0.001), commercial formulation treatment (<sup>d</sup>p<0.01, <sup>e</sup>p<0.001).

BLQ denotes below the quantification limit (<2ng/ml)

**Table S8:** Concentration of PTX (ng/g of liver) in carcinogen-treated SD rats upon i.v. administration of experimental formulations.

| Time (h) | Upon administration of free-drug (PF) | Upon administration of commercial formulation (MF) | Upon administration of PTX-NP | Upon administration of PTX-NPL2 | Upon administration of PTX-NPL5 |
|----------|---------------------------------------|----------------------------------------------------|-------------------------------|---------------------------------|---------------------------------|
| 1        | 94.26 ± 4.12*                         | 141.82 ± 3.58 <sup>a</sup>                         | 169.41 ± 5.14 <sup>a,b</sup>  | 234.13 ± 4.17 <sup>a,b,c</sup>  | 249.42 ± 5.35 <sup>a,b,c</sup>  |
| 2        | 215.61 ± 5.32                         | 342.56 ± 5.16 <sup>a</sup>                         | 239.71 ± 4.22 <sup>a,b</sup>  | 398.41 ± 4.23 <sup>a,b,c</sup>  | 418.12 ± 5.28 <sup>a,b,c</sup>  |
| 4        | 261.84 ± 3.59                         | 451.78 ± 3.74 <sup>a</sup>                         | 272.56 ± 3.39 <sup>a,b</sup>  | 528.81 ± 7.24 <sup>a,b,c</sup>  | 563.19 ± 3.20 <sup>a,b,c</sup>  |
| 6        | 96.88 ± 4.84                          | 429.17 ± 4.77 <sup>a</sup>                         | 471.91 ± 7.87 <sup>a,b</sup>  | 702.76 ± 3.36 <sup>a,b,c</sup>  | 728.26 ± 4.69 <sup>a,b,c</sup>  |
| 8        | 32.18 ± 6.71                          | 232.61 ± 5.16 <sup>a</sup>                         | 335.63 ± 3.38 <sup>a,b</sup>  | 615.57 ± 7.20 <sup>a,b,c</sup>  | 641.56 ± 7.89 <sup>a,b,c</sup>  |
| 10       | 11.78 ± 5.43                          | 145.27 ± 2.29 <sup>a</sup>                         | 153.69 ± 4.27 <sup>a,b</sup>  | 414.53 ± 5.49 <sup>a,b,c</sup>  | 436.18 ± 6.43 <sup>a,b,c</sup>  |
| 24       | 4.12 ± 1.68                           | 66.41 ± 4.52 <sup>a</sup>                          | 107.18 ± 6.17 <sup>a,b</sup>  | 245.26 ± 5.23 <sup>a,b,c</sup>  | 268.93 ± 4.87 <sup>a,b,c</sup>  |
| 48       | BLQ                                   | 12.62 ± 9.12                                       | 51.29 ± 2.28 <sup>a,b</sup>   | 132.65 ± 4.15 <sup>a,b,c</sup>  | 156.45 ± 2.97 <sup>a,b,c</sup>  |

\*Data show mean ± SD (n=3). <sup>(a,b,c)</sup>Significant difference when compared to the data obtained upon free-drug treatment (<sup>a</sup>p<0.01), commercial formulation treatment (<sup>b</sup>p<0.01) and PTX-NP treatment (<sup>c</sup>p<0.01).

BLQ denotes below the quantification limit (<2ng/ml)



**Table S9** Docking results of 39 and 63 base pair oligonucleotides with surface biomarker proteins of neoplastic hepatocytes.

| S. No                              | Name of Protein                        | PDB ID  | (-) Docking Score | Interacting Residues                                                                                                                                                                           | Interactions                                                                                                                                                                                  |
|------------------------------------|----------------------------------------|---------|-------------------|------------------------------------------------------------------------------------------------------------------------------------------------------------------------------------------------|-----------------------------------------------------------------------------------------------------------------------------------------------------------------------------------------------|
| Oligonucleotide with 39 base pairs |                                        |         |                   |                                                                                                                                                                                                |                                                                                                                                                                                               |
| 1                                  | Tumor Associated Glycoprotein (TAG-72) | 6bsb 72 | 227.82            | ALA: 1106, PHE: 1042, LEU: 1089, THR: 1104, PHE: 1146, ASN: 1091, ASP: 1143, SER: 1142, PHE: 1044, SER: 1137, ASP: 1138, HIS: 1138, GLU: 1118, ASN: 1122 and LYS: 1125                         | Hydrogen bonding (classical and non-classical) interactions, Salt bridge, Attractive charges, $\pi$ -Anion, $\pi$ - $\pi$ -T-shaped, $\pi$ - $\pi$ -stacked and $\pi$ -sigma and $\pi$ -alkyl |
| 2                                  | Heat shock protein-70 (HSP-70)         | 6do2    | 235.68            | LYS: 163, THR: 29, LYS: 46, ASN: 47, GLY: 407, LEU: 405, ASP: 26, VAL: 27, MET: 196, ARG: 49, GLY: 40, GLU: 51, TYR: 160, SER: 406, LYS: 185, ILE: 199, ILE: 198, ARG: 197, LYS: 213, GLY: 240 | Hydrogen bonding (classical and non-classical) interactions, Salt bridge, attractive charges, $\pi$ - $\pi$ stacked, $\pi$ -alkyl, $\pi$ -sigma                                               |
| Oligonucleotide with 63 base pairs |                                        |         |                   |                                                                                                                                                                                                |                                                                                                                                                                                               |
| 1                                  | Tumor Associated Glycoprotein (TAG-72) | 6bsb 72 | 205.23            | HIS: 1048, ASP: 1138, SER: 1140, SER: 1046, GLN: 1102, SER: 1074, ASN: 1091, GLY: 1088, LEU: 1087, ARG: 1108, PHE: 1044, SER: 1142, VAL: 1144 and PHE: 1146                                    | Hydrogen bonding (classical and non-classical) interactions, Attractive charges, $\pi$ - $\pi$ -T shaped, $\pi$ - $\pi$ -stacked, $\pi$ -sigma                                                |

|   |                                |      |        |                                                                                                                                                                                                          |                                                                                                                                                                                |
|---|--------------------------------|------|--------|----------------------------------------------------------------------------------------------------------------------------------------------------------------------------------------------------------|--------------------------------------------------------------------------------------------------------------------------------------------------------------------------------|
| 2 | Heat shock protein-70 (HSP-70) | 6do2 | 230.46 | MET: 196, VAL: 27, ASP: 26, GLY: 407, ASN: 47, LYS: 46, TYR: 160, GLU: 51, LYS: 46, ARG: 49, SER: 406, THR: 29, GLN: 401, ILE: 207, LYS: 163, ILE: 198, ILE: 199, ARG: 197, GLY: 204, LYS: 213, LYS: 185 | Hydrogen bonding (classical and non-classical) interactions, Salt bridge, attractive charges, $\pi$ -cation, $\pi$ - $\pi$ stacked, $\pi$ -alkyl, $\pi$ -sigma, $\pi$ -Sulphur |
|---|--------------------------------|------|--------|----------------------------------------------------------------------------------------------------------------------------------------------------------------------------------------------------------|--------------------------------------------------------------------------------------------------------------------------------------------------------------------------------|

---
